# Supplementary material
Source: PubMed Central journal article supplement (PMC2894537)

**S1**

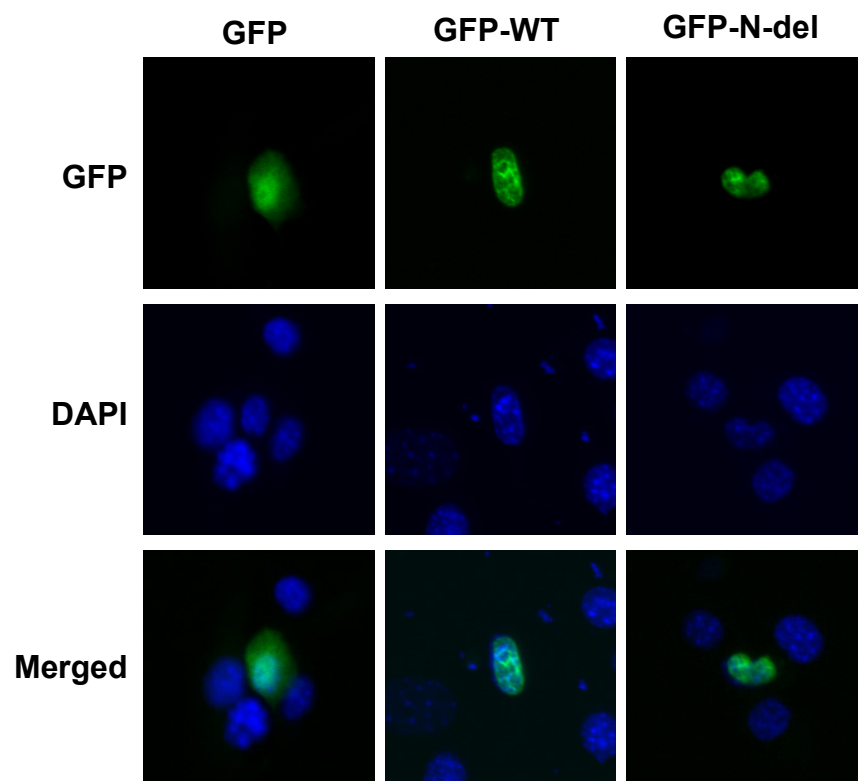

Supplement: NIHMS213604-supplement-Supplemental_info.pdf [file NIHMS213604-supplement-Supplemental_info.pdf]
